# Supplementary material
Source: Royal Society of Chemistry journal article supplement (doi:10.1039/d6cc02265k)
Supplement: d6cc02265k1.pdf [file d6cc02265k1.pdf]

## Supporting Information

### Intermediate Single Crystal Trapping of COF-300 via Organic Lewis

#### Acid Catalysis

Tian Wang <sup>\*a</sup>, Ming-Yang Fu <sup>\*a</sup>, Hao Wang <sup>\*a</sup>, Cheng Yi <sup>a</sup>, Du-Yong Chen <sup>a</sup>, Qiang Liu <sup>a</sup>, Yin-Shan Meng <sup>a, c</sup>,  
Jiyun Hu <sup>\*b</sup>, Tao Liu <sup>\*a, c</sup>

---

<sup>a</sup> State Key Laboratory of Fine Chemicals, Frontier Science Center for Smart Materials, School of Chemical Engineering, Dalian University of Technology, No.2 Linggong Road, Dalian 116024, China; E-mail: mengys@dlut.edu.cn; liutao@dlut.edu.cn.

<sup>b</sup> Dongguan Key Laboratory of Interdisciplinary Science for Advanced Materials and Large-Scale Scientific Facilities, School of Physical Sciences, Great Bay University, Dongguan 523000, China. E-mail: hujiyun@gbu.edu.cn

<sup>c</sup> Liaoning Binhai Laboratory, Dalian 116023, China.

\* Tian Wang, Ming-Yang Fu and Hao Wang contributed equally to this work.

## 1. General considerations

### 1.1 Instruments

**Single-crystal X-ray diffraction** data were collected using a Bruker D8 Venture X-ray single-crystal diffractometer with Metaljet. The APEX IV (v2022.10-0) software was used to collect (by SAINT V8.40 A) and refine (by SADABS V2.03 and SHELXT V2018/2) the diffraction data. Crystal structures were solved using the direct method with the Olex 2 (V1.5) software, and data were corrected using the built-in SHELXL program (V2014-3) through the full-matrix least-squares method. All nonhydrogen atoms were treated anisotropically, while hydrogen atoms were determined from electron density or theoretical hydrogenation.

**Powder X-ray diffraction (PXRD)** patterns were collected on a SmartLab 9KW desktop X-Ray diffractometer operated at 30 kV and 15 mA (step = 0.01°, scan rate = 3°/min).

**Fourier Transform Infrared (FT-IR)** spectra were recorded on a ThermoFisher-6700.

**Scanning Electron Microscopy (SEM)** images were recorded with a Hitachi SU5000 scanning electron microscope.

**Thermogravimetric analysis (TGA)** measurements were performed on a TA Q600 instrument. The samples were heated from room temperature to 800 °C under N<sub>2</sub> flow (25 ml min<sup>-1</sup>) at a heating rate of 10 K min<sup>-1</sup>.

**N<sub>2</sub> sorption** measurements were performed using an Autosorb-IQ-MP/XR Automated Gas Sorption Analyzer. Nitrogen sorption isotherms were collected at 77 K after vacuum activation of the samples at 120 °C overnight.

### 1.2 Materials and Reagents.

All chemicals were purchased from Innochem and used without further purification.

## 2. Synthesis

### Synthesis of COF-300 (dia-7):

Tetrakis(4-aminophenyl)methane (TAM, 13 mg, 0.034 mmol), Benzene-1,4-dicarboxaldehyde (BDA, 12 mg, 0.089 mmol), and tris(pentafluorophenyl)borane (16 mg, 0.031 mmol) were added to a 20 mL glass vial. Subsequently, 2 mL of a mixed solvent (1,4-dioxane/mesitylene, 0.5 mL/1.5 mL) was introduced into the vial. After thorough mixing, the vial was placed in an oven and heated at 60 °C for 72 h. Afterwards, the COF solid was filtered off and rinsed thoroughly with THF, acetone, and methanol. The powder was dried under vacuum at 60 °C.

### Synthesis of SIM-300:

Tetrakis(4-aminophenyl)methane (TAM, 13 mg, 0.034 mmol), Benzene-1,4-dicarboxaldehyde (BDA, 12 mg, 0.089 mmol), and tris(pentafluorophenyl)borane (16 mg, 0.031 mmol) were added to a 20 mL glass vial. Subsequently, 2 mL of a mixed solvent (1,4-dioxane/mesitylene, 0.5 mL/1.5 mL) was introduced into the vial. After thorough mixing, the vial was placed in an oven and heated at 60 °C for 24 hours, followed by standing undisturbed at 30 °C for 72 h. Afterwards, the solid was filtered off and rinsed thoroughly with THF, acetone, and methanol. The powder was dried under vacuum at 60 °C.

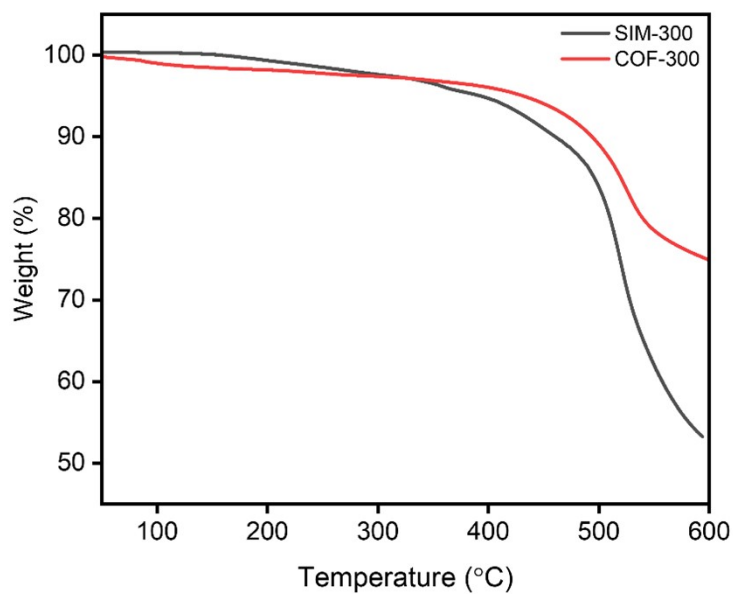

**Figure S1.** TGA traces of SIM-300 and COF-300.

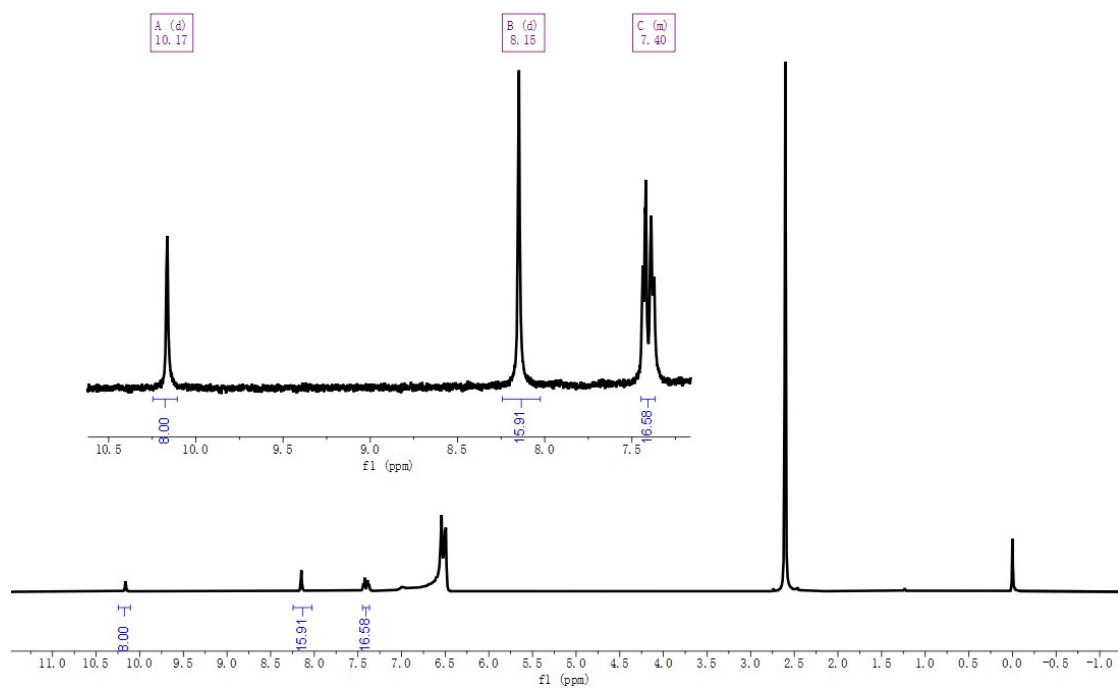

**Figure S2.** The <sup>1</sup>H NMR Spectrum of SIM-300 after acid hydrolysis with DCl in DMSO-d<sub>6</sub>. Peaks at  $\delta = 10.17$  and  $8.15$  ppm correspond to the aldehyde proton and aromatic protons of DBA, while the peak at  $\delta = 7.41$  ppm is attributed to aromatic protons from the benzene ring of TAM. The ratio of TAM/BDA is ca. 1/4 calculated from the corresponding peak integrals.

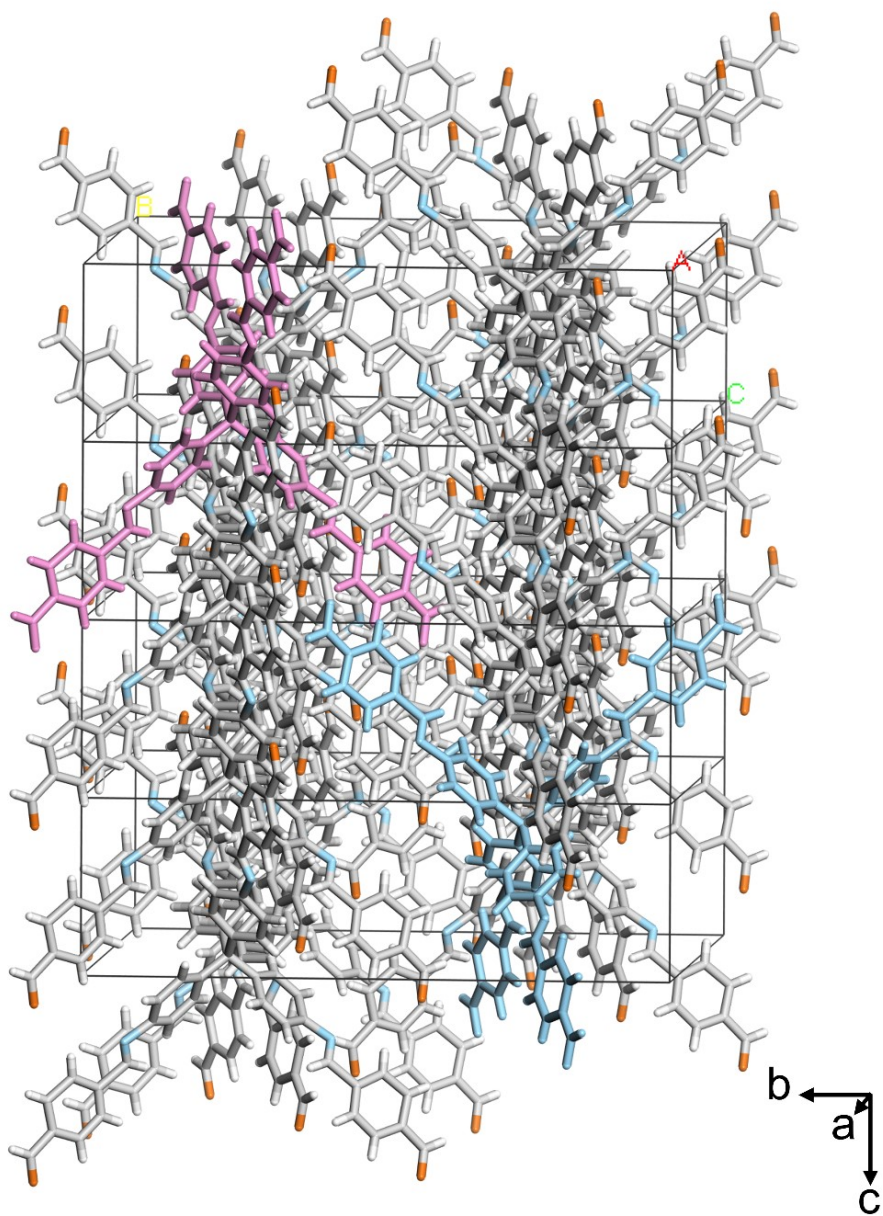

**Figure S3.** Schematic illustration of the pair of oligomer (blue and purple) to be bonded to form COF-300 from SIM-300.

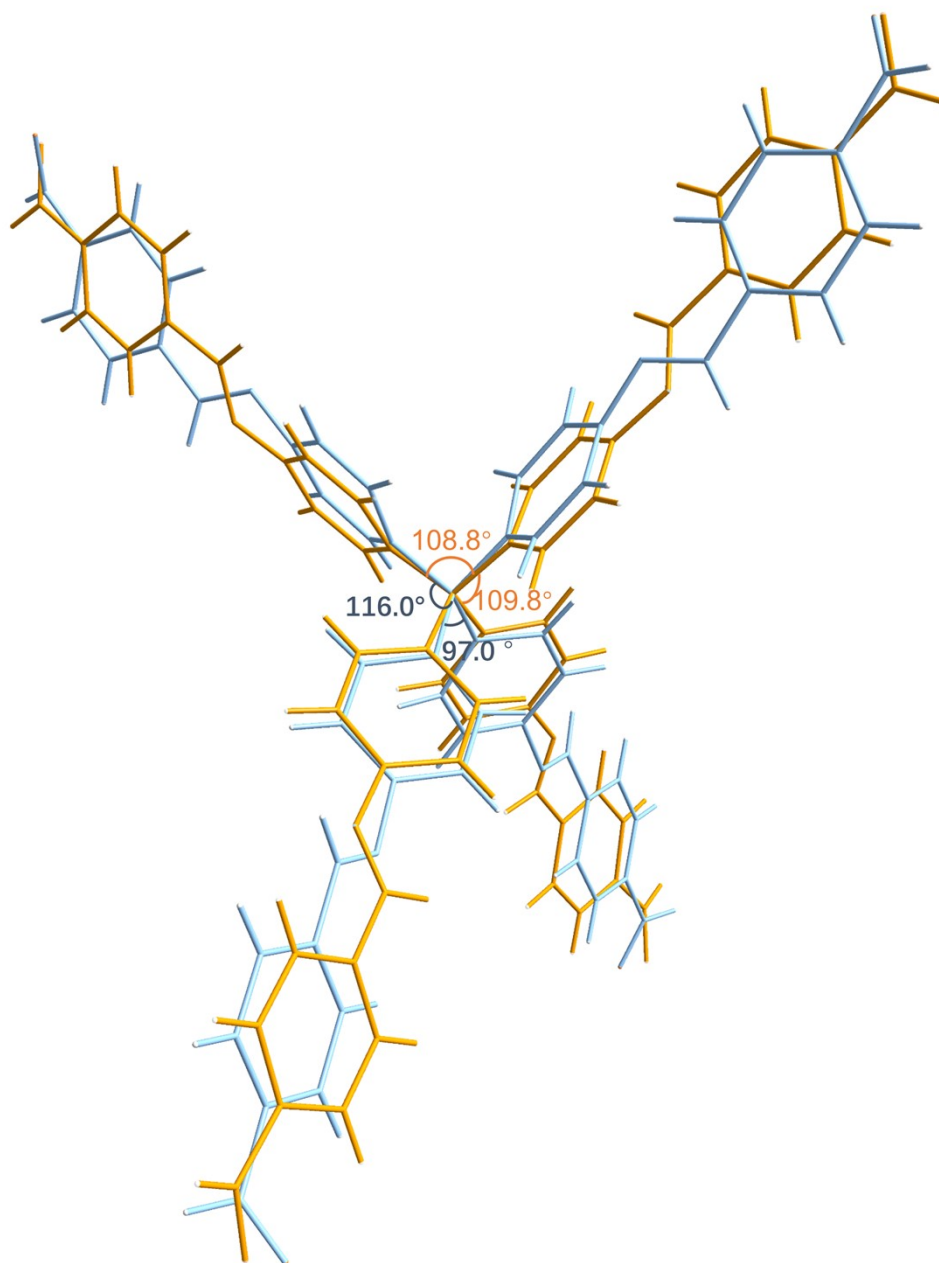

**Figure S4.** The angles of SIM-300.

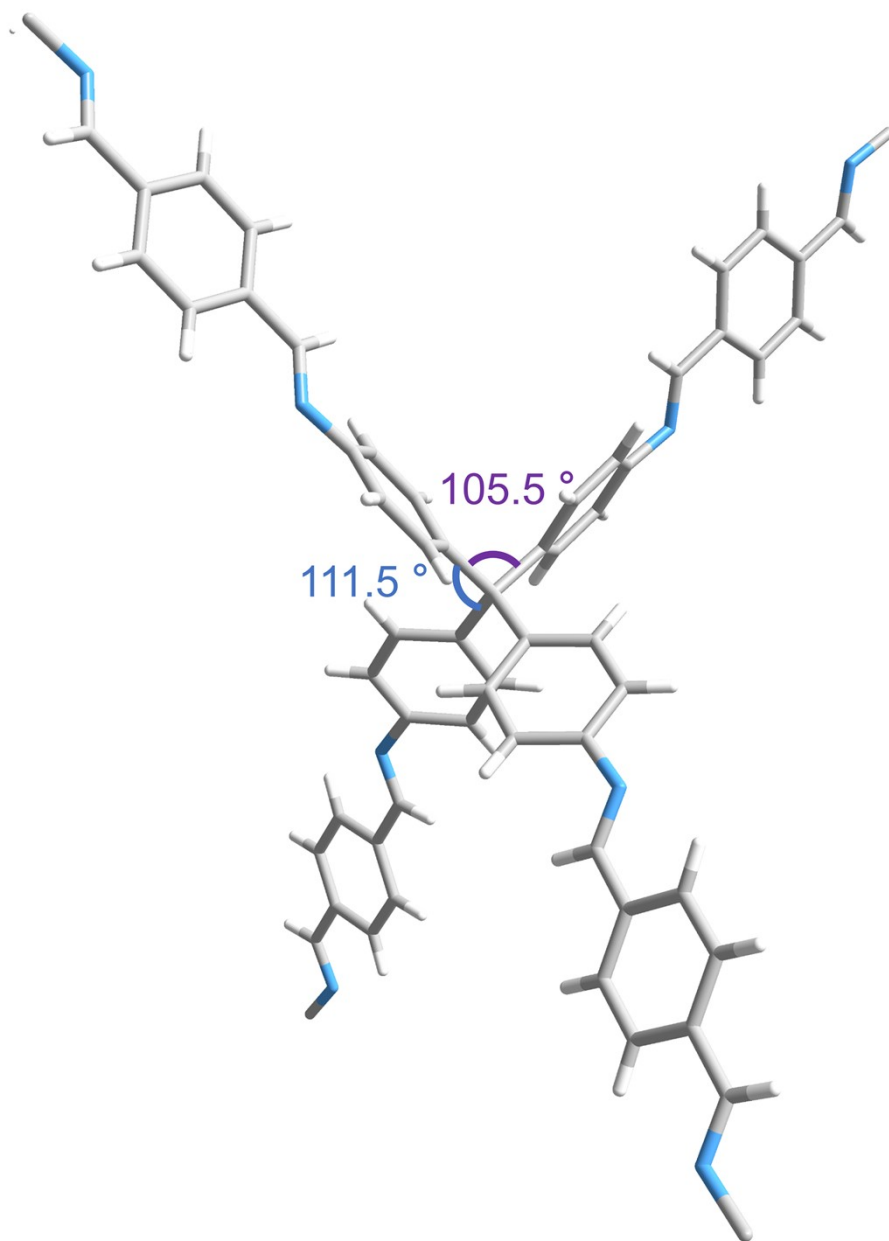

**Figure S5.** The angles of COF-300.

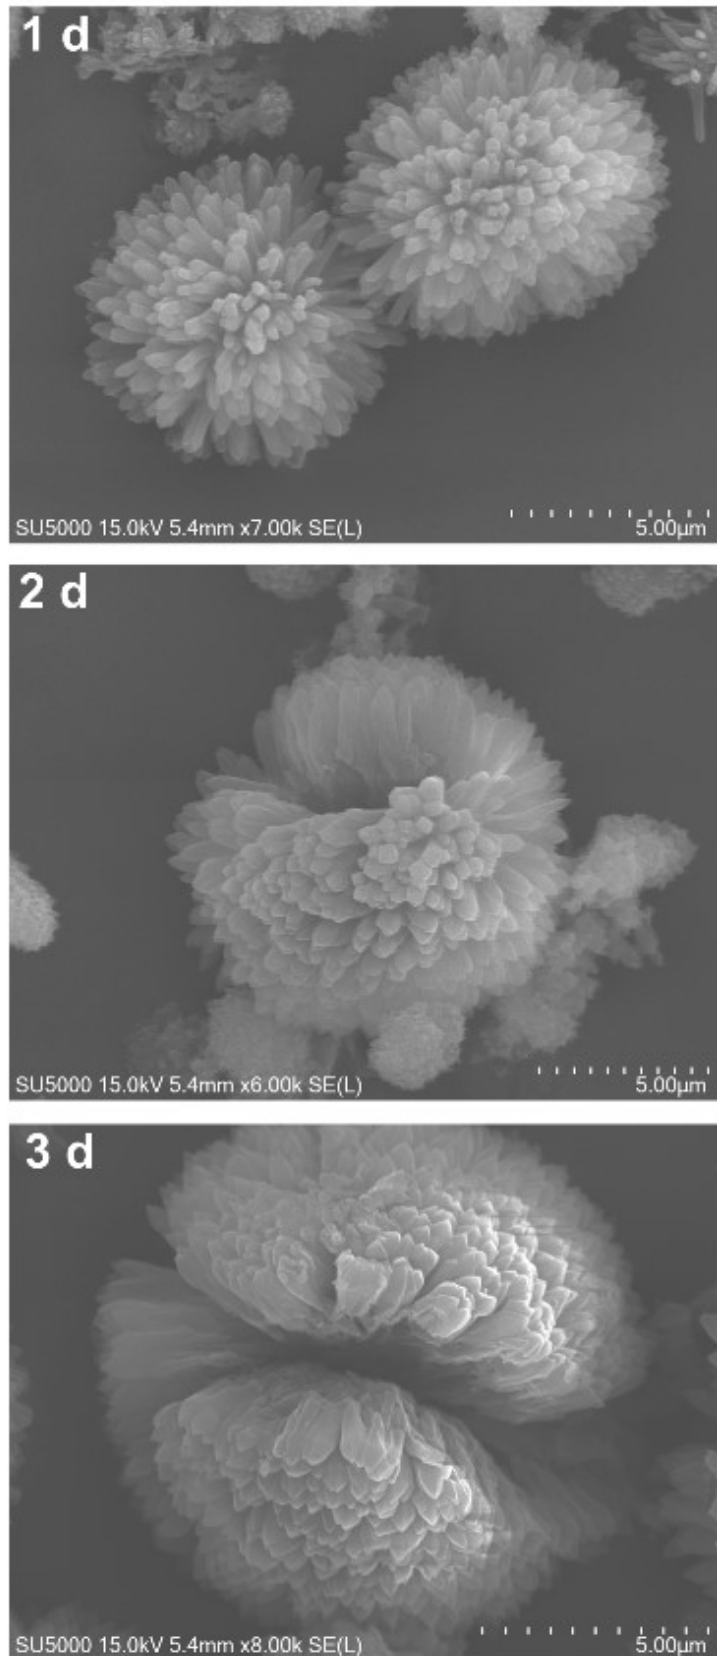

**Figure S6.** SEM images of solid precipitates at different time intervals during the synthesis of COF-300.

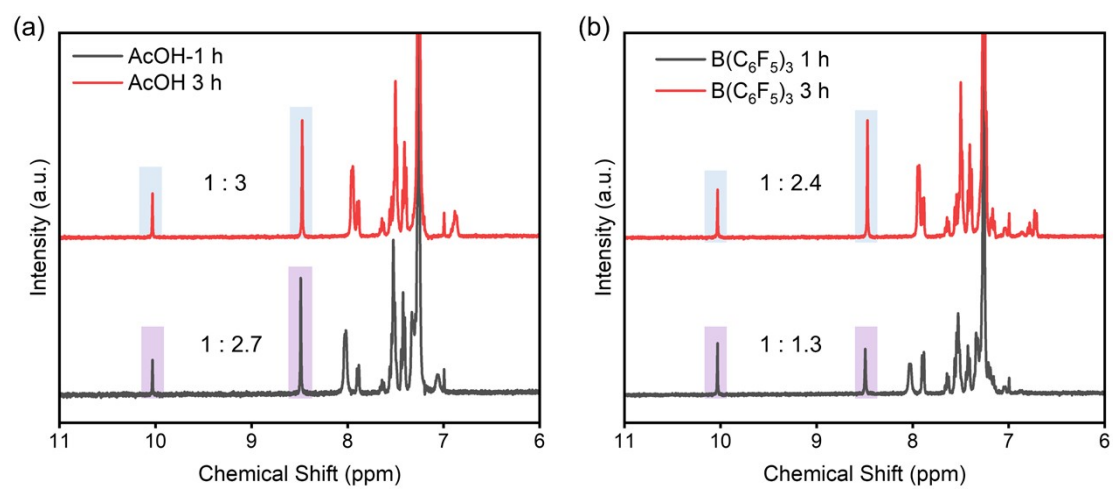

**Figure S7.** Reaction progress was monitored by liquid-state NMR for model reactions catalyzed by (a) acetic acid and (b)  $B(C_6F_5)_3$ . The signal at 10.03 ppm is attributed to benzaldehyde, whereas the signal at 8.47 ppm is assigned to the proton on the imine carbon in the product.

**Table S1.** Crystallographic data and refinement parameters of **SIM-300**.

| Compound                                      | SIM-300                                                       |
|-----------------------------------------------|---------------------------------------------------------------|
| Formula                                       | C <sub>61</sub> H <sub>48</sub> N <sub>4</sub> O <sub>6</sub> |
| CCDC                                          | 2512929                                                       |
| Fw                                            | 933.03                                                        |
| Crystal size (mm <sup>3</sup> )               | 0.13 × 0.12 × 0.1                                             |
| Crystal system                                | tetragonal                                                    |
| Space group                                   | <i>I4<sub>1</sub>/a</i>                                       |
| a (Å)                                         | 25.771(2)                                                     |
| b (Å)                                         | 25.771(2)                                                     |
| c (Å)                                         | 7.6244(5)                                                     |
| α, β, γ (°)                                   | 90                                                            |
| V (Å <sup>3</sup> )                           | 5063.8(10)                                                    |
| Z                                             | 4                                                             |
| Radiation                                     | Ga Kα (λ = 1.34139)                                           |
| Data/restraints/parameters                    | 2494/568/292                                                  |
| 2θ range (°)                                  | 5.968 to 112.172                                              |
| μ (mm <sup>-1</sup> )                         | 0.404                                                         |
| Reflections collected                         | 11031                                                         |
| R <sub>int</sub>                              | 0.0626                                                        |
| R <sub>1</sub> , wR <sub>2</sub> [I ≥ 2σ (I)] | 0.0624, 0.1961                                                |
| R <sub>1</sub> , wR <sub>2</sub> [all data]   | 0.1375, 0.2512                                                |
| GOOF                                          | 0.954                                                         |

$$R_1 = \sum (|F_0| - |F_c|) / \sum |F_0|; wR_2 = [\sum w (|F_0| - |F_c|)^2 / \sum w F_0^2]^{1/2}$$

**Table S2** Selected bond lengths (Å) for **SIM-300**.

|                     |           |           |           |
|---------------------|-----------|-----------|-----------|
| C1–C2               | 1.551(4)  | C11–C12   | 1.378(11) |
| C1–C2 <sup>1</sup>  | 1.552(4)  | C12–C13   | 1.366(10) |
| C1–C2 <sup>2</sup>  | 1.552(4)  | C12–C15   | 1.489(7)  |
| C1–C2 <sup>3</sup>  | 1.552(4)  | C13–C14   | 1.380(8)  |
| C1–C2A <sup>1</sup> | 1.563(6)  | O1A–C15A  | 1.227(10) |
| C1–C2A <sup>3</sup> | 1.563(6)  | N1A–C5A   | 1.415(7)  |
| C1–C2A              | 1.563(6)  | N1A–C8A   | 1.242(8)  |
| C1–C2A <sup>2</sup> | 1.563(6)  | C2A–C3A   | 1.411(15) |
| O1–C15              | 1.228(7)  | C2A–C7A   | 1.364(13) |
| N1–C5               | 1.411(5)  | C3A–C4A   | 1.390(12) |
| N1–C8               | 1.244(5)  | C4A–C5A   | 1.413(14) |
| C2–C3               | 1.417(9)  | C5A–C6A   | 1.347(12) |
| C2–C7               | 1.354(9)  | C6A–C7A   | 1.366(12) |
| C3–C4               | 1.373(8)  | C8A–C9A   | 1.468(8)  |
| C4–C5               | 1.410(10) | C9A–C10A  | 1.376(9)  |
| C5–C6               | 1.343(9)  | C9A–C14A  | 1.364(10) |
| C6–C7               | 1.376(8)  | C10A–C11A | 1.376(11) |
| C8–C9               | 1.472(6)  | C11A–C12A | 1.377(15) |
| C9–C10              | 1.372(6)  | C12A–C13A | 1.365(14) |
| C9–C14              | 1.367(7)  | C12A–C15A | 1.490(8)  |
| C10–C11             | 1.375(8)  | C13A–C14A | 1.383(11) |

<sup>1</sup>5/4-Y, 1/4+X, 5/4-Z; <sup>2</sup>-1/4+Y, 5/4-X, 5/4-Z; <sup>3</sup>1-X, 3/2-Y, +Z

**Table S3** Hydrogen bond geometries for the oligomer of **SIM-300**.

| D-H                              | d <sub>D-H</sub> (Å) | d <sub>H...A</sub> (Å) | ∠ <sub>DHA</sub> (°) | d <sub>D...A</sub> (Å) | A               |
|----------------------------------|----------------------|------------------------|----------------------|------------------------|-----------------|
| C6 <sup>a</sup> –H6 <sup>a</sup> | 0.930                | 2.611                  | 127.05               | 3.257                  | O1 <sup>a</sup> |

**Table S4** Selected bond angles (°) for **SIM-300**.

|                                       |           |                |           |
|---------------------------------------|-----------|----------------|-----------|
| C2-C1-C2 <sup>1</sup>                 | 109.8(6)  | N1-C8-C9       | 121.9(4)  |
| C2 <sup>1</sup> -C1-C2 <sup>2</sup>   | 108.8(11) | C10-C9-C8      | 119.9(5)  |
| C2-C1-C2 <sup>2</sup>                 | 109.8(6)  | C14-C9-C8      | 121.1(4)  |
| C2 <sup>1</sup> -C1-C2 <sup>3</sup>   | 109.8(6)  | C14-C9-C10     | 118.9(5)  |
| C2-C1-C2 <sup>3</sup>                 | 108.8(11) | C9-C10-C11     | 120.7(6)  |
| C2 <sup>2</sup> -C1-C2 <sup>3</sup>   | 109.8(6)  | C10-C11-C12    | 120.4(5)  |
| C2-C1-C2A <sup>1</sup>                | 108.4(16) | C11-C12-C15    | 122.1(7)  |
| C2 <sup>1</sup> -C1-C2A <sup>2</sup>  | 102.8(7)  | C13-C12-C11    | 118.6(4)  |
| C2 <sup>1</sup> -C1-C2A <sup>3</sup>  | 108.4(16) | C13-C12-C15    | 119.3(8)  |
| C2 <sup>1</sup> -C1-C2A <sup>1</sup>  | 7.7(11)   | C12-C13-C14    | 120.9(6)  |
| C2 <sup>3</sup> -C1-C2A <sup>3</sup>  | 7.7(11)   | C9-C14-C13     | 120.4(5)  |
| C2 <sup>2</sup> -C1-C2A <sup>2</sup>  | 7.7(11)   | O1-C15-C12     | 122.3(7)  |
| C2 <sup>2</sup> -C1-C2A <sup>3</sup>  | 117.0(12) | C8A-N1A-C5A    | 122.3(8)  |
| C2 <sup>3</sup> -C1-C2A <sup>2</sup>  | 108.4(16) | C3A-C2A-C1     | 118.1(12) |
| C2 <sup>2</sup> -C1-C2A <sup>1</sup>  | 102.8(7)  | C7A-C2A-C1     | 123.3(12) |
| C2-C1-C2A <sup>2</sup>                | 117.0(12) | C7A-C2A-C3A    | 116.6(7)  |
| C2 <sup>3</sup> -C1-C2A <sup>1</sup>  | 117.0(12) | C4A C3A-C2A    | 120.1(11) |
| C2-C1-C2A <sup>3</sup>                | 102.8(7)  | C3A-C4A-C5A    | 120.5(10) |
| C2A <sup>1</sup> -C1-C2A <sup>2</sup> | 97(3)     | C4A-C5A-N1A    | 125.0(11) |
| C2A <sup>1</sup> -C1-C2A              | 116.0(15) | C6A-C5A-N1A    | 116.9(9)  |
| C2A <sup>2</sup> -C1-C2A <sup>3</sup> | 116.0(15) | C6A-C5A-C4A    | 116.9(5)  |
| C2A <sup>3</sup> -C1-C2A              | 97(3)     | C5A-C6A-C7A    | 122.9(10) |
| C2A <sup>2</sup> -C1-C2A              | 116.0(15) | C2A-C7A-C6A    | 121.8(10) |
| C2A <sup>1</sup> -C1-C2A <sup>3</sup> | 116.0(15) | N1A-C8A-C9A    | 122.6(7)  |
| C8-N1-C5                              | 120.8(5)  | C10A-C9A-C8A   | 120.0(7)  |
| C3-C2-C1                              | 116.1(6)  | C14A-C9A-C8A   | 121.4(6)  |
| C7-C2-C1                              | 126.4(6)  | C14A-C9A-C10A  | 118.7(7)  |
| C7-C2-C3                              | 117.5(3)  | C11A-C10A-C9A  | 120.5(8)  |
| C4-C3-C2                              | 120.2(6)  | C10A-C11A-C12A | 120.6(8)  |

|          |          |                |           |
|----------|----------|----------------|-----------|
| C3-C4-C5 | 120.4(6) | C11A-C12A-C15A | 121.9(11) |
| C4-C5-N1 | 124.9(6) | C13A-C12A-C11A | 118.9(6)  |
| C6-C5-N1 | 117.0(6) | C13A-C12A-C15A | 119.2(11) |
| C6-C5-C4 | 117.9(3) | C12A-C13A-C14A | 120.3(9)  |
| C5-C6-C7 | 122.0(6) | C9A-C14A-C13A  | 121.1(8)  |
| C2-C7-C6 | 121.8(6) | O1A-C15A-C12A  | 122.1(10) |

---

<sup>1</sup>5/4-Y, 1/4+X, 5/4-Z; <sup>2</sup>-1/4+Y, 5/4-X, 5/4-Z; <sup>3</sup>1-X, 3/2-Y, +Z
